# Supplementary figures and images for: Schematic memory components converge within angular gyrus during retrieval
Source: eLife journal article supplement (doi:10.7554/elife.09668), 2015-11-17

**A**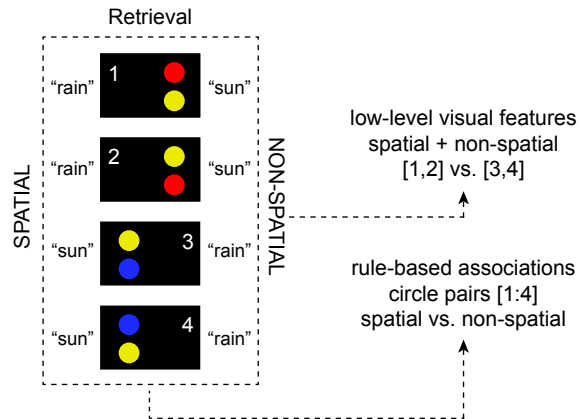**B**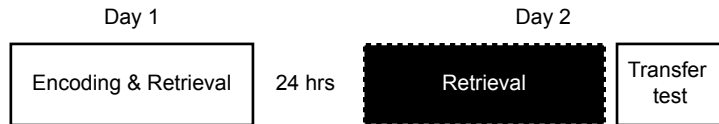**C**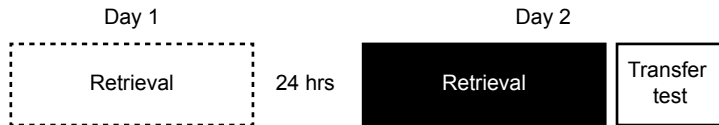**D**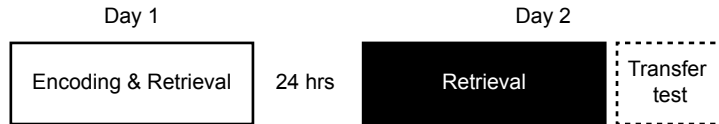

Supplement: supp [file elife-09668-supp-v1.zip]

**A**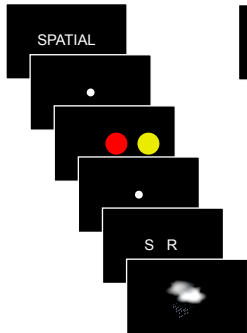**B**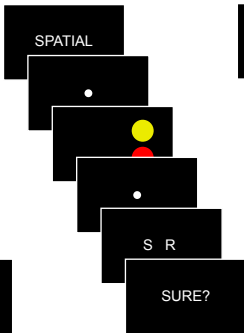**C**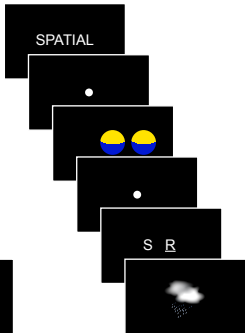

Supplement: supp [file elife-09668-supp-v1.zip]
